# Supplementary material for: Effects of Fumonisin B and Hydrolyzed Fumonisin B on Growth and Intestinal Microbiota in Broilers
Source: MDPI journal article supplement (doi:10.3390/toxins14030163), 2022-02-23
Supplement: s1 [file s1]

# Effects of Fumonisin B and Hydrolyzed Fumonisin B on Growth and Intestinal Microbiota in Broilers

Song Yu , Bingxuan Jia, Huikang Lin, Shuo Zhang, Dianshen Yu, Na Liu and Aibo Wu

**Table S1.** FBs and HFBs affect the body weight of broilers.

|        | ANOVA with Tukey's multiple comparisons test | Significant | P-Value |
|--------|----------------------------------------------|-------------|---------|
| Week 6 | Control vs. L-FBs                            | ns          | 0.9315  |
|        | Control vs. H-FBs                            | ns          | 0.1385  |
|        | Control vs. L-HFBs                           | ns          | 0.9991  |
|        | Control vs. H-HFBs                           | ns          | 0.1507  |
|        | L-FBs vs. H-FBs                              | *           | 0.0174  |
|        | L-FBs vs. L-HFBs                             | ns          | 0.9783  |
|        | L-FBs vs. H-HFBs                             | *           | 0.0196  |
|        | H-FBs vs. L-HFBs                             | ns          | 0.0600  |
|        | H-FBs vs. H-HFBs                             | ns          | >0.9999 |
|        | L-HFBs vs. H-HFBs                            | ns          | 0.0666  |
| Week 7 | Control vs. L-FBs                            | ns          | 0.7984  |
|        | Control vs. H-FBs                            | ***         | 0.0002  |
|        | Control vs. L-HFBs                           | ns          | 0.8260  |
|        | Control vs. H-HFBs                           | ***         | 0.0006  |
|        | L-FBs vs. H-FBs                              | *           | 0.0129  |
|        | L-FBs vs. L-HFBs                             | ns          | >0.9999 |
|        | L-FBs vs. H-HFBs                             | *           | 0.0278  |
|        | H-FBs vs. L-HFBs                             | **          | 0.0059  |
|        | H-FBs vs. H-HFBs                             | ns          | 0.9992  |
|        | L-HFBs vs. H-HFBs                            | *           | 0.0140  |
| Week 8 | Control vs. L-FBs                            | ns          | 0.8592  |
|        | Control vs. H-FBs                            | ****        | <0.0001 |
|        | Control vs. L-HFBs                           | ns          | 0.9819  |
|        | Control vs. H-HFBs                           | ****        | <0.0001 |
|        | L-FBs vs. H-FBs                              | ****        | <0.0001 |
|        | L-FBs vs. L-HFBs                             | ns          | 0.9887  |
|        | L-FBs vs. H-HFBs                             | ***         | 0.0009  |
|        | H-FBs vs. L-HFBs                             | ****        | <0.0001 |
|        | H-FBs vs. H-HFBs                             | ns          | 0.9241  |
|        | L-HFBs vs. H-HFBs                            | ****        | <0.0001 |

**Table S2.** Differentially expressed bacteria after FBs and HFBs treatment.

|        | ANOVA                                  | Kruskal Wallis                                                                                                                                                                                                                                             |
|--------|----------------------------------------|------------------------------------------------------------------------------------------------------------------------------------------------------------------------------------------------------------------------------------------------------------|
| Phylum |                                        | Elusimicrobia<br>Planctomycetes                                                                                                                                                                                                                            |
|        | Class                                  |                                                                                                                                                                                                                                                            |
|        | Elusimicrobia                          | Elusimicrobia                                                                                                                                                                                                                                              |
|        | Phycisphaerae                          | Phycisphaerae<br>Subgroup_22                                                                                                                                                                                                                               |
|        | Order                                  |                                                                                                                                                                                                                                                            |
|        | WD260                                  | WD260                                                                                                                                                                                                                                                      |
|        | Deltaproteobacteria_Incertae_Sedis     | Deltaproteobacteria_Incertae_Sedis                                                                                                                                                                                                                         |
|        | Subgroup_13                            | Subgroup_13                                                                                                                                                                                                                                                |
|        | Reyranellales                          | Reyranellales                                                                                                                                                                                                                                              |
|        | Gastranaerophilales                    | Gastranaerophilales                                                                                                                                                                                                                                        |
|        | Subgroup_2                             | Subgroup_2                                                                                                                                                                                                                                                 |
|        | Acetobacterales                        | Acetobacterales                                                                                                                                                                                                                                            |
|        | Actinomarinales                        | JG36-TzT-191                                                                                                                                                                                                                                               |
|        | SJA-28                                 | SAR324_clade(Marine_group_B)                                                                                                                                                                                                                               |
|        | MVP-88                                 | Rickettsiales                                                                                                                                                                                                                                              |
|        | Mollicutes_RF39                        | R7C24                                                                                                                                                                                                                                                      |
|        | uncultured_Acidobacteriales_bacterium  | Enterobacteriales<br>KF-JG30-C25<br>uncultured_soil_bacterium<br>Izimaplasmatales<br>Rhodospirillales<br>Lactobacillales                                                                                                                                   |
| Family |                                        |                                                                                                                                                                                                                                                            |
|        | Candidatus_Nitrosoarchaeum_limnia_SFB1 | Candidatus_Nitrosoarchaeum_limnia_SFB1                                                                                                                                                                                                                     |
|        | SM2D12                                 | SM2D12                                                                                                                                                                                                                                                     |
|        | uncultured_Bradyrhizobiaceae_bacterium | uncultured_Bradyrhizobiaceae_bacterium                                                                                                                                                                                                                     |
|        | Prolixibacteraceae                     | Prolixibacteraceae                                                                                                                                                                                                                                         |
|        | uncultured_forest_soil_bacterium       | uncultured_forest_soil_bacterium                                                                                                                                                                                                                           |
|        | Mycobacteriaceae                       | Mycobacteriaceae                                                                                                                                                                                                                                           |
|        | Geodermatophilaceae                    | Geodermatophilaceae                                                                                                                                                                                                                                        |
|        | Magnetospirillaceae                    | Magnetospirillaceae                                                                                                                                                                                                                                        |
|        | Rhizobiales_Incertae_Sedis             | Rhizobiales_Incertae_Sedis                                                                                                                                                                                                                                 |
|        | Reyranellaceae                         | Reyranellaceae                                                                                                                                                                                                                                             |
|        | Tannerellaceae                         | Clostridiales_vadinBB60_group                                                                                                                                                                                                                              |
|        | S15-21                                 | uncultured_Acidothrmaceae_bacterium                                                                                                                                                                                                                        |
|        | Unknown_Family                         | Acetobacteraceae                                                                                                                                                                                                                                           |
|        | Chitinimonadaceae                      | Arcobacteraceae                                                                                                                                                                                                                                            |
|        | Ilumatobacteraceae                     | Paenibacillaceae<br>Saccharosporillaceae<br>Rs-E47_termite_group<br>metagenome<br>Nitrosococcaceae<br>SAR116_clade<br>Enterobacteriaceae<br>Inquilinaceae<br>Acidothrmaceae<br>A21b<br>URHD0088<br>Phaseolus_acutifolius_(tepary_bean)<br>Lactobacillaceae |
| Genus  |                                        |                                                                                                                                                                                                                                                            |
|        | GOUTA6                                 | GOUTA6                                                                                                                                                                                                                                                     |
|        | Magnetospirillum                       | Magnetospirillum                                                                                                                                                                                                                                           |
|        | uncultured_Rickettsiales_bacterium     | uncultured_Rickettsiales_bacterium                                                                                                                                                                                                                         |

|                                        |                                        |
|----------------------------------------|----------------------------------------|
| Candidatus_Nitrosoarchaeum_limnia_SFB1 | Candidatus_Nitrosoarchaeum_limnia_SFB1 |
| Sunxiuqinia                            | Sunxiuqinia                            |
| uncultured_Bradyrhizobiaceae_bacterium | uncultured_Bradyrhizobiaceae_bacterium |
| Lachnospiraceae_UCG-010                | Lachnospiraceae_UCG-010                |
| Erysipelotrichaceae_UCG-003            | Erysipelotrichaceae_UCG-003            |
| Klebsiella                             | Klebsiella                             |
| uncultured_forest_soil_bacterium       | uncultured_forest_soil_bacterium       |
| Clostridium_sensu_stricto_1            | Clostridium_sensu_stricto_1            |
| Lachnospiraceae_UCG-006                | Lachnospiraceae_UCG-006                |
| Anaerostipes                           | Anaerostipes                           |
| Deferrisoma                            | Deferrisoma                            |
| Ornithinimicrobium                     | Ornithinimicrobium                     |
| Chitiniphilus                          | Chitiniphilus                          |
| Erysipelothrix                         | Erysipelothrix                         |
| Mycobacterium                          | Mycobacterium                          |
| Undibacterium                          | Undibacterium                          |
| Granulicella                           | Granulicella                           |
| uncultured_Nitrosomonadales_bacterium  | uncultured_Nitrosomonadales_bacterium  |
| Flavonifractor                         | Paenibacillus                          |
| PAUC26f                                | wb1-P19                                |
| Draconibacterium                       | Segetibacter                           |
| Azovibrio                              | Lachnospiraceae_NK4B4_group            |
| Chitinimonas                           | WCHB1-32                               |
| Pseudolabrys                           | Lechevalieria                          |
| Amycolatopsis                          | Lachnospiraceae_AC2044_group           |
| Conexibacter                           | Polaromonas                            |
| [Eubacterium]_ventriosum_group         | Duganella                              |
| Azohydromonas                          | Roseiarcus                             |
| Ruminococcaceae_UCG-010                | Azospirillum                           |
| Parabacteroides                        | uncultured_proteobacterium             |
| Ruminococcaceae_UCG-003                | Kibdelosporangium                      |
|                                        | Plesiomonas                            |
|                                        | BIyi10                                 |
|                                        | Roseburia                              |
|                                        | Mycoplasma                             |
|                                        | GAS113                                 |
|                                        | Rheinheimera                           |
|                                        | Edaphobacter                           |
|                                        | [Eubacterium]_brachy_group             |
|                                        | Glutamicibacter                        |
|                                        | Roseomonas                             |
|                                        | Blastococcus                           |
|                                        | Inquilinus                             |
|                                        | Acidothermus                           |
|                                        | Eggerthella                            |
|                                        | Lactobacillus                          |
|                                        | Phaseolus_acutifolius_(tepary_bean)    |
|                                        | Anaerofilum                            |
|                                        | Sandaracinus                           |
|                                        | uncultured_Rhizomicrobium_sp.          |
|                                        | Xanthobacter                           |
|                                        | Fournierella                           |
|                                        | Lachnospiraceae_NK4A136_group          |
|                                        | Oleibacter                             |
|                                        | Dyella                                 |
|                                        | Triticum_aestivum_(bread_wheat)        |
|                                        | Arcobacter                             |
|                                        | Acidipila                              |
|                                        | Turneriella                            |
|                                        | uncultured_Acidothermaceae_bacterium   |

---

|                                        |                                        |
|----------------------------------------|----------------------------------------|
|                                        | uncultured_Nitrosomonadaceae_bacterium |
|                                        | uncultured_Hyphomicrobiaceae_bacterium |
|                                        | Clostridium_sensu_stricto_8            |
| Species                                |                                        |
| uncultured_Rickettsiales_bacterium     | uncultured_Rickettsiales_bacterium     |
| Candidatus_Nitrosoarchaeum_limnia_SFB1 | Candidatus_Nitrosoarchaeum_limnia_SFB1 |
| uncultured_forest_soil_bacterium       | uncultured_forest_soil_bacterium       |
| Bacteroides_acidifaciens_JCM_10556     | Bacteroides_acidifaciens_JCM_10556     |
| Lactobacillus_salivarius               | Lactobacillus_salivarius               |
| uncultured_rumen_bacterium             | uncultured_rumen_bacterium             |
| uncultured_Nitrosomonadales_bacterium  | uncultured_Nitrosomonadales_bacterium  |
| uncultured_spirochete                  | uncultured_Dongia_sp.                  |
| uncultured_organism                    | uncultured_Acidothermaceae_bacterium   |
| uncultured_soil_bacterium              | uncultured_Nitrosomonadaceae_bacterium |
|                                        | uncultured_Burkholderia_sp.            |
|                                        | Rhizobium_leguminosarum                |
|                                        | uncultured_Desulfovibrio_sp.           |
|                                        | uncultured_Polaromonas_sp.             |
|                                        | uncultured_Gemmatimonadaceae_bacterium |
|                                        | Lactobacillus_gasseri                  |
|                                        | uncultured_Hyphomicrobiaceae_bacterium |
|                                        | Phaseolus_acutifolius (tepary_bean)    |
|                                        | uncultured_Rhizomicrobium_sp.          |
|                                        | uncultured_Bradyrhizobiaceae_bacterium |
|                                        | Other                                  |
|                                        | uncultured_Lactobacillaceae_bacterium  |
|                                        | uncultured_Allobaculum_sp.             |
|                                        | Lactobacillus_vaginalis                |
|                                        | Triticum_aestivum (bread_wheat)        |

---

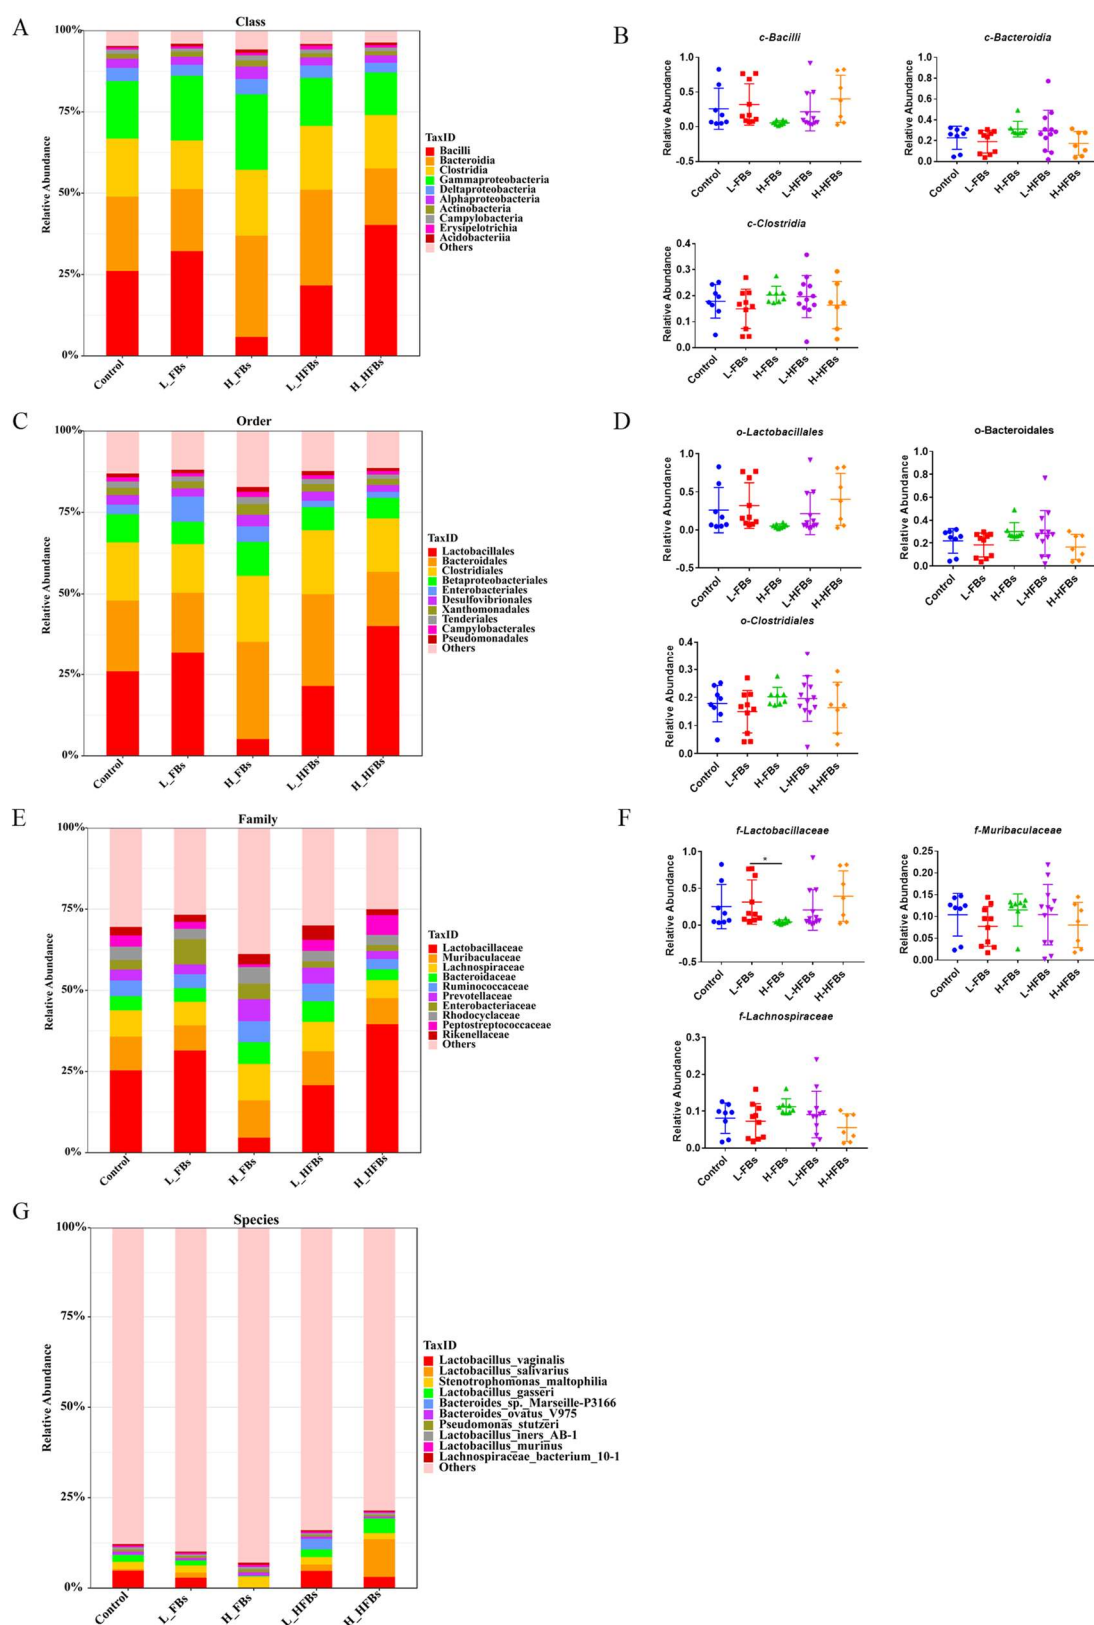

**Figure S1.** Relative abundance of bacteria and analysis of dominant bacteria at Class (A-B), Order (C-D), Family (E-F) and Species (G) level.

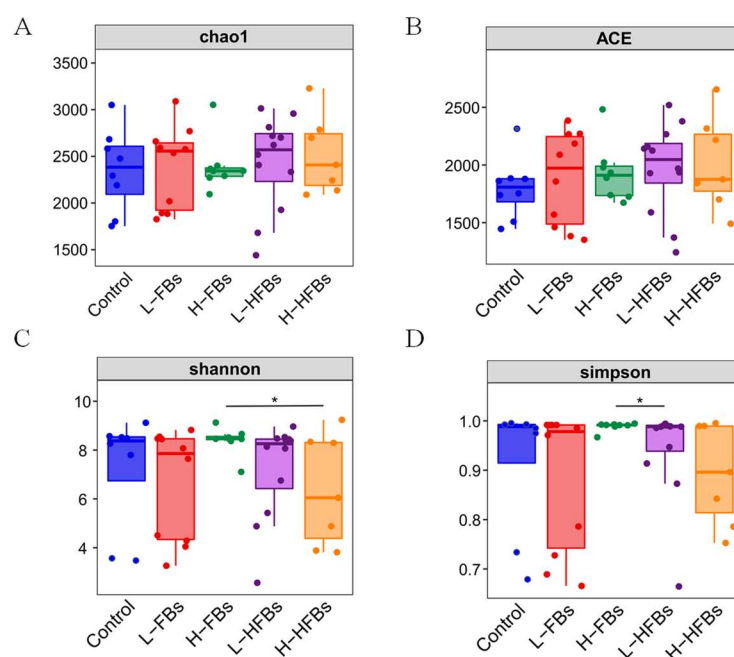

**Figure S2.** Alpha analysis of intestinal microbiota after FBs and HFBs treatment. **(A)** chao 1 analysis. **(B)** ACE analysis. **(C)** shannon analysis. **(D)** simpson analysis.
